# Supplementary material for: Molecular engineering of a colorless, extremely tough, superiorly self-recoverable, and healable poly(urethane–urea) elastomer for impact-resistant applications
Source: Royal Society of Chemistry journal article supplement (doi:10.1039/d1mh00548k), 2021-01-01
Supplement: d1mh00548k1.pdf [file d1mh00548k1.pdf]

# Electronic Supplementary Information

## **Molecular Engineering of Colorless, Extremely Tough, Superiorly Self-Recoverable, and Healable Poly(Urethane-Urea) Elastomer for Impact-Resistant Applications**

Dong Wang,<sup>a</sup> ZhiFeng Wang,<sup>b</sup> ShangYang Ren,<sup>a</sup> JianHua Xu,<sup>a</sup> Cheng Wang,<sup>a</sup> Po Hu,<sup>a</sup> and JiaJun Fu<sup>\*a</sup>

<sup>a</sup>School of Chemical Engineering, Nanjing University of Science and Technology, Nanjing 210094, P. R. China

<sup>b</sup>Testing Center, Yangzhou University, Yangzhou 225002, P. R. China

\*Corresponding Author: [fujiajun668@gmail.com](mailto:fujiajun668@gmail.com) (J. J. Fu)

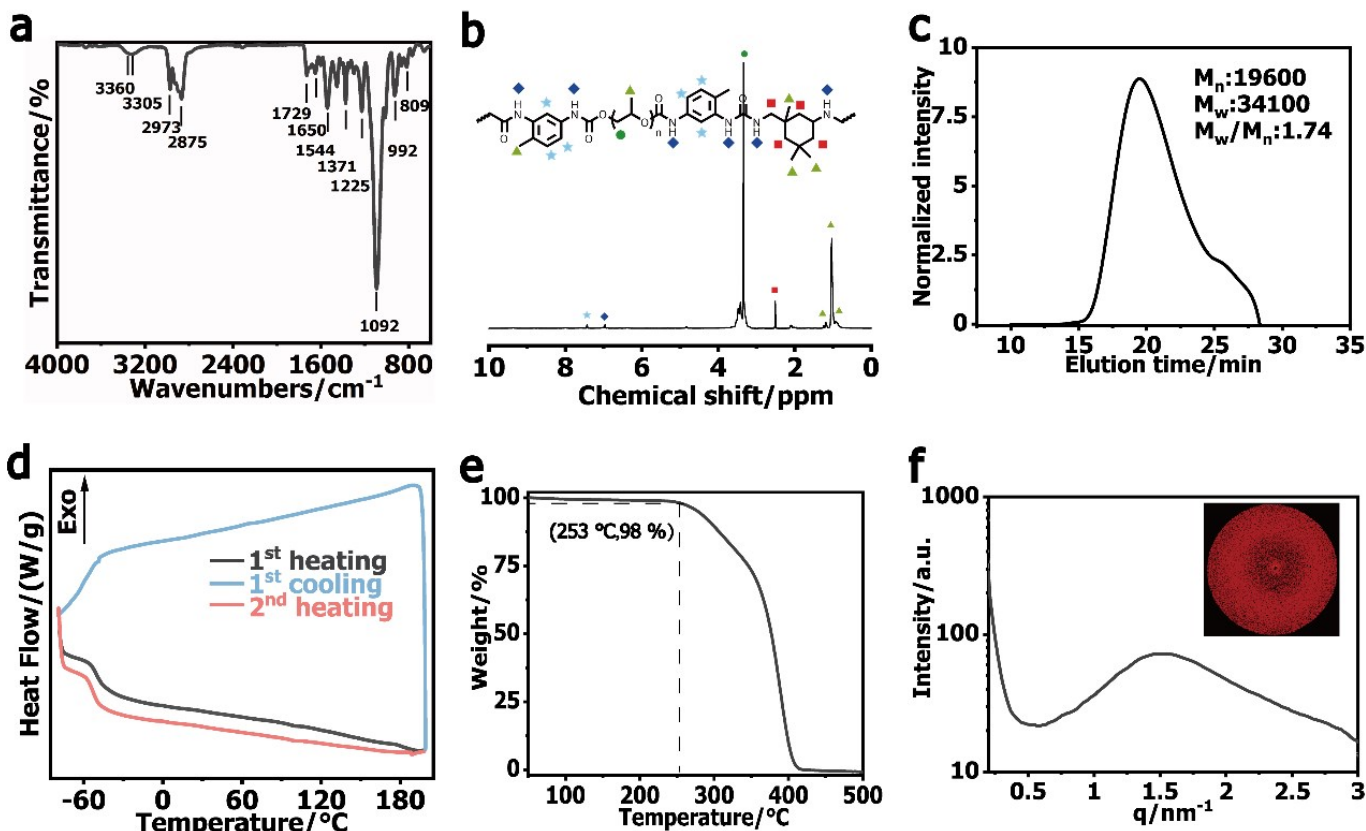

**Fig. S1** Characterization of PPGTD-IPDA. a) FTIR of PPGTD-IPDA. FTIR ( $\text{cm}^{-1}$ ): 3360/3305 ( $\nu_{\text{NH}}$ ), 2875/2973 ( $\nu_{\text{CH}_3}$ ), 1371 ( $\delta_{\text{CH}_3}$ ), 1729 ( $\nu_{\text{C=O}}$ , urethane), 1650 ( $\nu_{\text{C=O}}$ , urea), 1544 ( $\gamma_{\text{NH}}$ ), 992/809 ( $\delta_{\text{C}_7\text{H}_6}$ ), 1225 ( $\nu_{\text{C-C}}$ ), and 1092 ( $\nu_{\text{C-O-C}}$ ). b)  $^1\text{H}$  NMR of PPGTD-IPDA (500 MHz,  $(\text{CD}_3)_2\text{SO}$ , 25 °C). c) GPC elution curve of PPGTD-IPDA. d) DSC curve of PPGTD-IPDA. Neither endothermic nor exothermic peak was found, indicating the amorphous state. e) TGA curve of PPGTD-IPDA. No obvious degradation before 250 °C indicates its thermal-stability. f) SAXS data of PPGTD-IPDA. The microphase-separated structure was not identified.

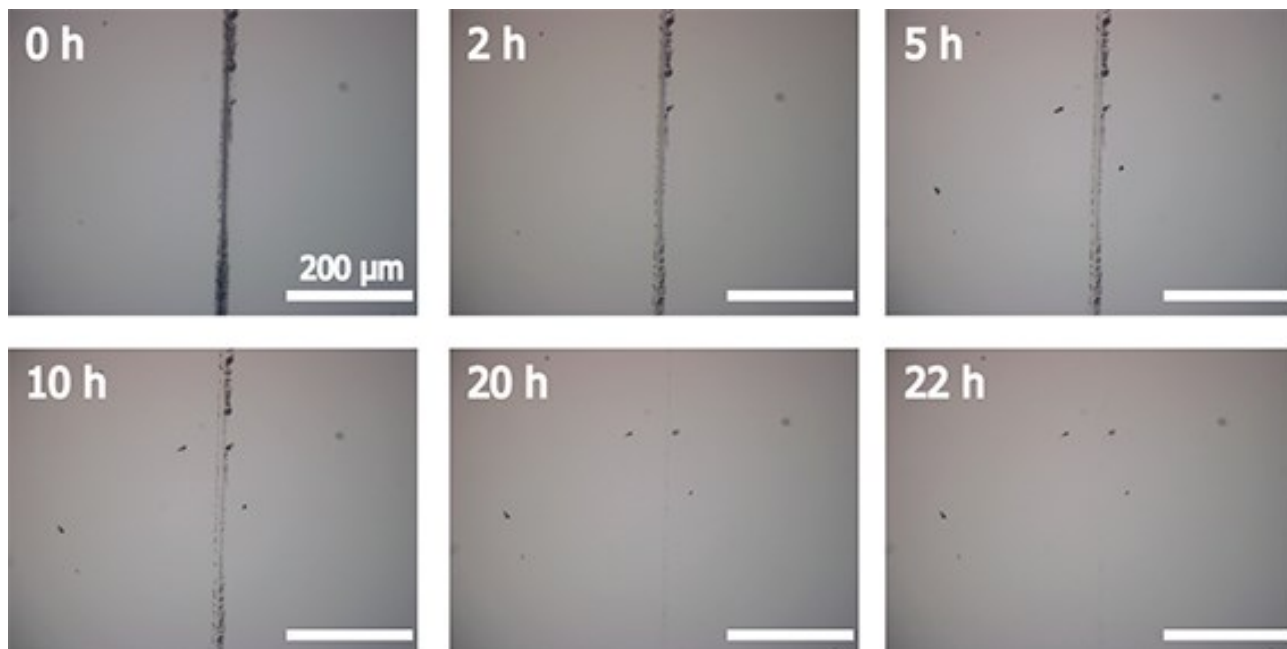

**Fig. S2** Optical microscopy images of artificial scratch on the PPGTD-IPDA specimen before and healing for different time under ambient conditions.

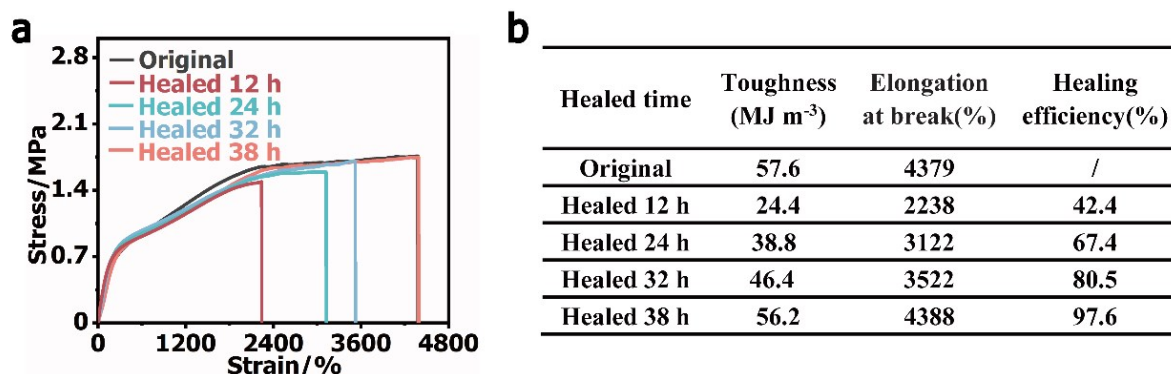

Fig. S3 a) Tensile stress-strain curves of PPGTD-IPDA specimens at different healing time under ambient conditions. b) Summary of mechanical properties of PPGTD-IPDA at different healing time. The healing efficiency is defined as the proportion of toughness restored relative to the original toughness (area under the stress-strain curve).

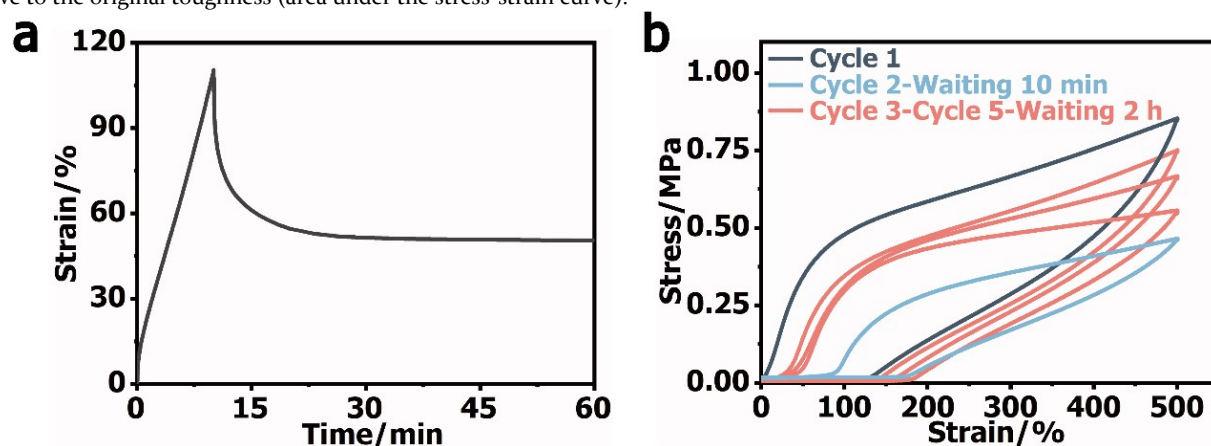

Fig. S4 a) Creep-recovery behavior of PPGTD-IPDA specimen at a stress of 0.08 MPa. The distinct residual strain was observed, meaning the noncovalent network could not return back to the original state. b) Cyclic tensile curves of PPGTD-IPDA specimen at a strain of 500%. As shown, the specimen could not eliminate the residual strain within 2 h after being stretched to 5x its original length.

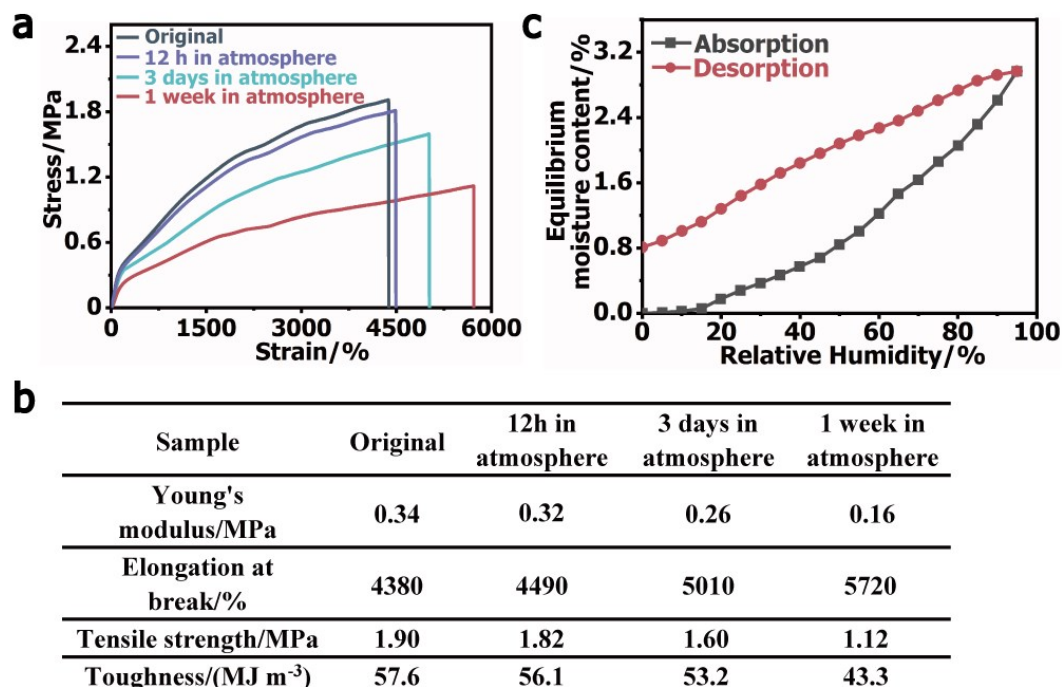

Fig. S5 a) Tensile stress-strain curves of the original, three-days-aging and one-week-aging PPGTD-IPDA specimens. b) Summary of the mechanical properties of PPGTD-IPDA specimens that being exposed to the outdoor for different time. The Young's modulus and the tensile strength decreased and the strain at break increased with time, revealing the elastomer gradually turned to weak and soft. c) Water vapour adsorption-desorption isotherm for PPGTD-IPDA specimen. As shown, it can be inferred that the water retained in PPGTD-IPDA can dissociate the loosely packed hard domains, resulting the degradation of mechanical strength.

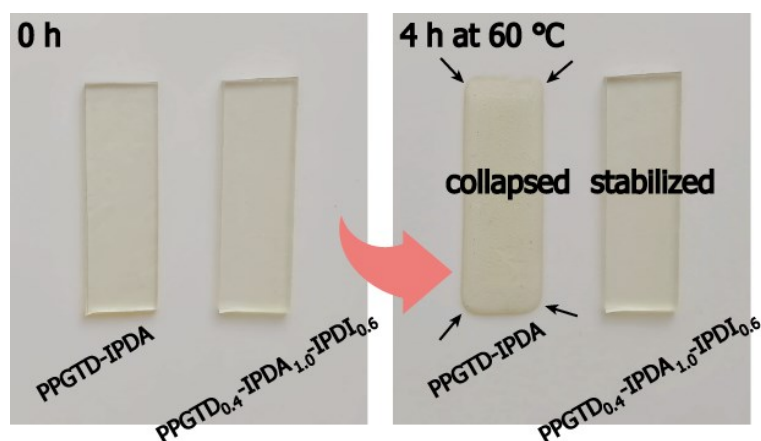

**Fig. S6** Comparisons of PPGTD-IPDA and PPGTD<sub>0.4</sub>-IPDA<sub>1.0</sub>-IPDI<sub>0.6</sub> at 25 °C and 60 °C for 4 h for assessing the stability at relatively high temperature. As shown, PPGTD<sub>0.4</sub>-IPDA<sub>1.0</sub>-IPDI<sub>0.6</sub> was very stable after being heated. However, the four corners of PPGTD-IPDI were obviously collapsed, indicating the inferior thermal stability.

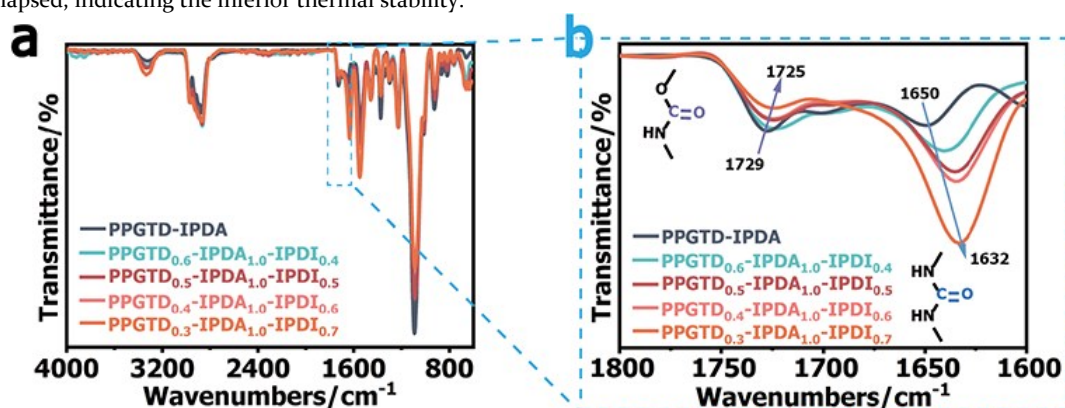

**Fig. S7** FTIR spectra of PPGTD-IPDA and PPGTD<sub>1-x</sub>-IPDA<sub>1.0</sub>-IPDI<sub>x</sub> (X=0.4, 0.5, 0.6, 0.7). FTIR of PPGTD<sub>0.4</sub>-IPDA<sub>1.0</sub>-IPDI<sub>0.6</sub> (cm<sup>-1</sup>): 3312/3362 (ν<sub>NH</sub>), 2875/2973 (ν<sub>CH3</sub>), 1371 (δ<sub>CH3</sub>), 1725 (ν<sub>C=O</sub>, urethane), 1632 (ν<sub>C=O</sub>, urea), 1544 (γ<sub>NH</sub>), 992/809 (δ<sub>C7H6</sub>), 1225 (ν<sub>C-C</sub>), and 1092 (ν<sub>C-O-C</sub>). As can be easily seen, with the increase of IPDI content, the intensity of ν<sub>C=O</sub> at 1650 cm<sup>-1</sup> (urea unit) increased, proving that the IPDI was covalently linked with IPDA in the hard domains. The intensity of ν<sub>C=O</sub> at 1729 cm<sup>-1</sup> (urethane unit), originating from PPGTD, accordingly decreased. In addition, the obvious shifts of ν<sub>C=O</sub> confirm that the hard domains of PPGTD<sub>1-x</sub>-IPDA<sub>1.0</sub>-IPDI<sub>x</sub> assembled by H-bonds are different from PPGTD-IPDA.

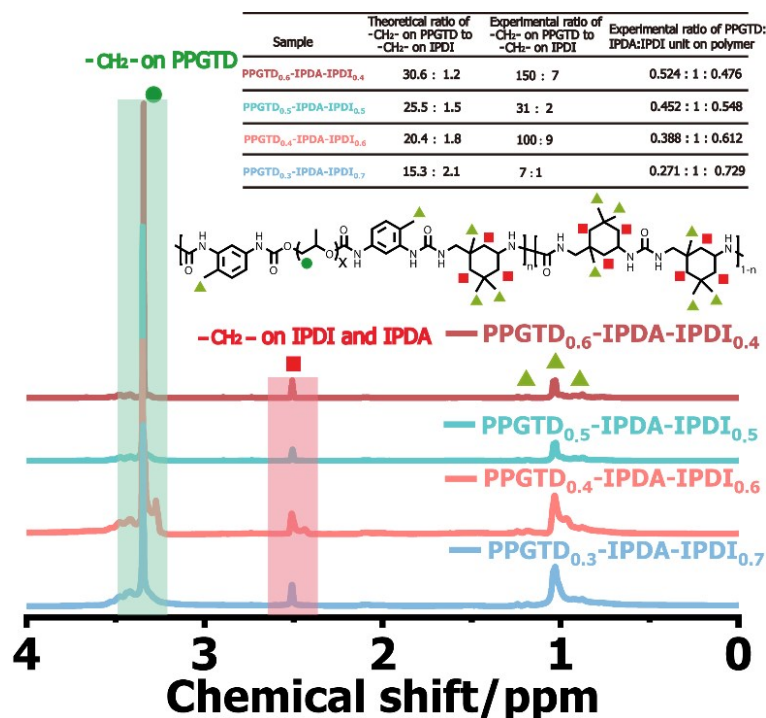

**Fig. S8** <sup>1</sup>H NMR of PPGTD<sub>1-x</sub>-IPDA<sub>1.0</sub>-IPDI<sub>x</sub> (x=0.4, 0.5, 0.6, 0.7), (500 MHz, (CD<sub>3</sub>)<sub>2</sub>SO, room temperature).

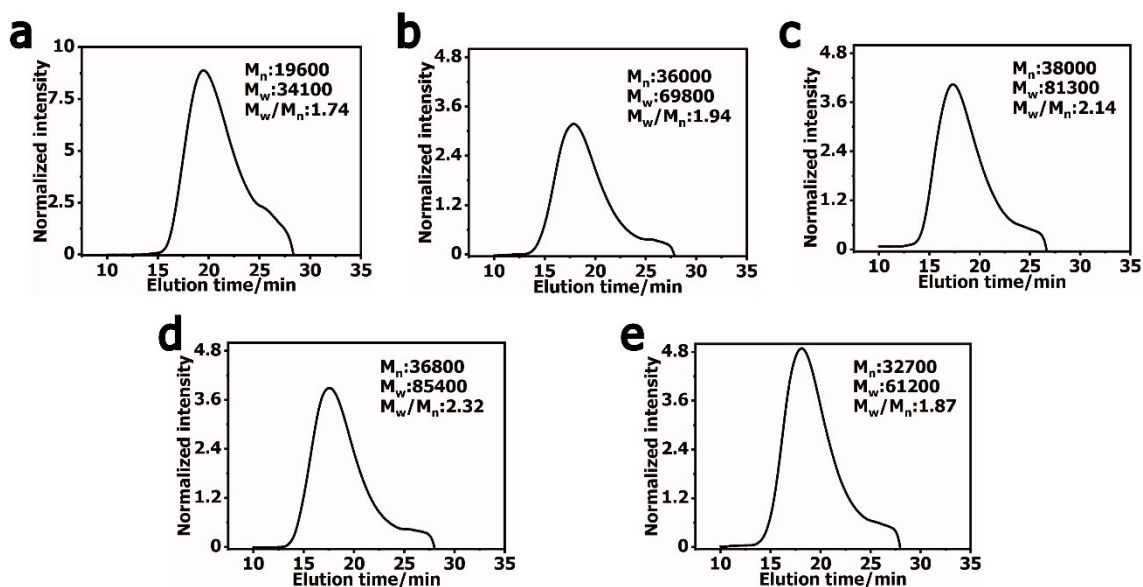

Fig. S9 GPC elution curves of a) PPGTD-IPDA, b) PPGTD<sub>0.6</sub>-IPDA<sub>1.0</sub>-IPDI<sub>0.4</sub>, c) PPGTD<sub>0.5</sub>-IPDA<sub>1.0</sub>-IPDI<sub>0.5</sub>, d) PPGTD<sub>0.4</sub>-IPDA<sub>1.0</sub>-IPDI<sub>0.6</sub>, and e) PPGTD<sub>0.3</sub>-IPDA<sub>1.0</sub>-IPDI<sub>0.7</sub>.

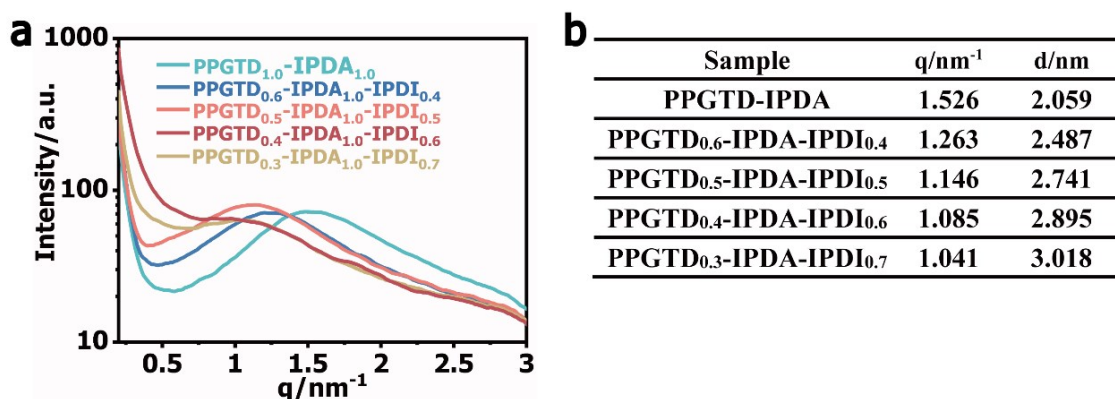

Fig. S10 a) SAXS data of PPGTD<sub>1-x</sub>-IPDA<sub>1.0</sub>-IPDI<sub>x</sub> specimens ( $x=0, 0.4, 0.5, 0.6, 0.7$ ). b) Summary of the relative  $q$  vector and phase spacing  $d$  values of PPGTD<sub>1-x</sub>-IPDA<sub>1.0</sub>-IPDI<sub>x</sub>.

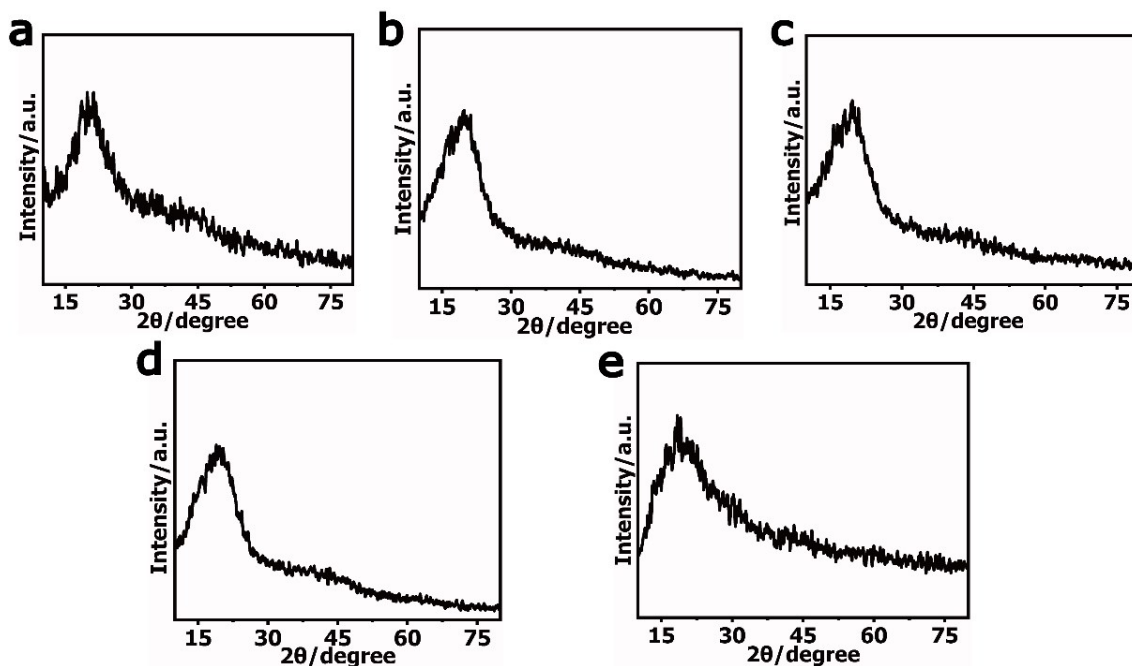

Fig. S11 XRD curves of PPGTD<sub>1-x</sub>-IPDA<sub>1.0</sub>-IPDI<sub>x</sub> ( $x=0.4, 0.5, 0.6, 0.7$ ). As shown, all the curves only displayed a broad diffraction peak-centered, indicating the amorphous states under ambient conditions.



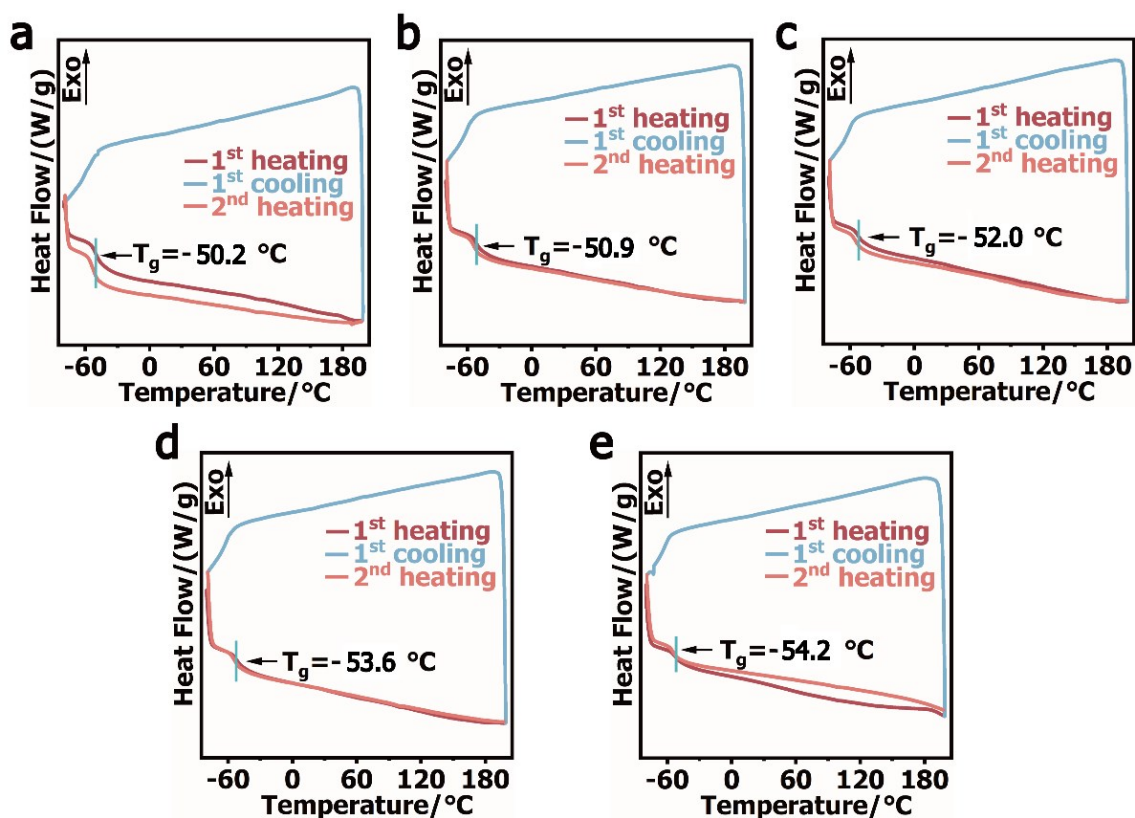

Fig. S12 DSC curves of PPGTD<sub>1-x</sub>-IPDA<sub>1.0</sub>-IPDI<sub>x</sub> (x=0,0.4, 0.5, 0.6, 0.7). a) PPGTD-IPDA, b) PPGTD<sub>0.6</sub>-IPDA<sub>1.0</sub>-IPDI<sub>0.4</sub>, c) PPGTD<sub>0.5</sub>-IPDA<sub>1.0</sub>-IPDI<sub>0.5</sub>, d) PPGTD<sub>0.4</sub>-IPDA<sub>1.0</sub>-IPDI<sub>0.6</sub>, and e) PPGTD<sub>0.3</sub>-IPDA<sub>1.0</sub>-IPDI<sub>0.7</sub>.

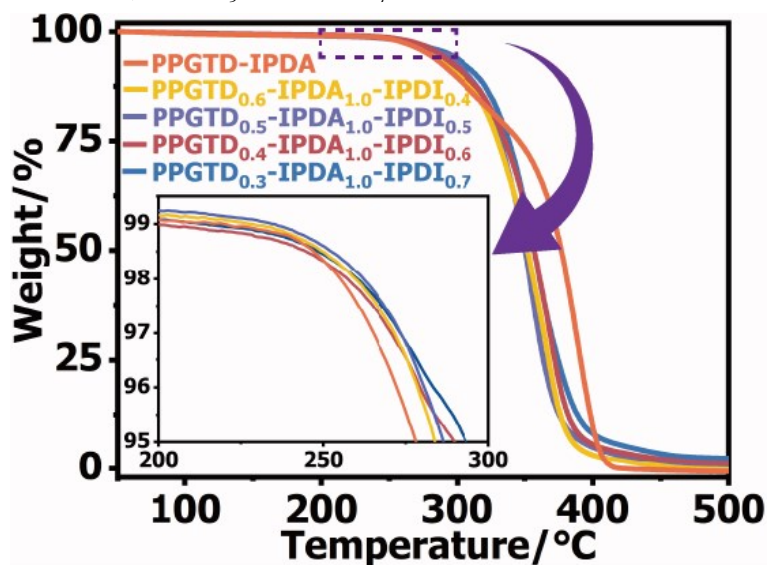

Fig. S13 TGA curve of PPGTD<sub>1-x</sub>-IPDA<sub>1.0</sub>-IPDI<sub>x</sub> (X=0.4, 0.5, 0.6, 0.7) upon heating from 50 to 500 °C at a rate of 10 °C min<sup>-1</sup>.

Table S1 Summary of the mechanical properties of PPGTD<sub>1-x</sub>-IPDA<sub>1.0</sub>-IPDI<sub>x</sub> (x=0, 0.4, 0.5, 0.6, 0.7).

| Sample                                                         | Strain at break(%) | Young's modulus(MPa) | Tensile strength(MPa) | Toughness (MJ m <sup>-3</sup> ) |
|----------------------------------------------------------------|--------------------|----------------------|-----------------------|---------------------------------|
| PPGTD-IPDA                                                     | 4380               | 0.34                 | 1.9                   | 57.6                            |
| PPGTD <sub>0.6</sub> -IPDA <sub>1.0</sub> -IPDI <sub>0.4</sub> | 3740               | 3.5                  | 19.9                  | 392.5                           |
| PPGTD <sub>0.5</sub> -IPDA <sub>1.0</sub> -IPDI <sub>0.5</sub> | 3530               | 5.19                 | 28.1                  | 478.2                           |
| PPGTD <sub>0.4</sub> -IPDA <sub>1.0</sub> -IPDI <sub>0.6</sub> | 2970               | 7.84                 | 33.4                  | 503.3                           |
| PPGTD <sub>0.3</sub> -IPDA <sub>1.0</sub> -IPDI <sub>0.7</sub> | 1730               | 25.2                 | 31.9                  | 386.4                           |

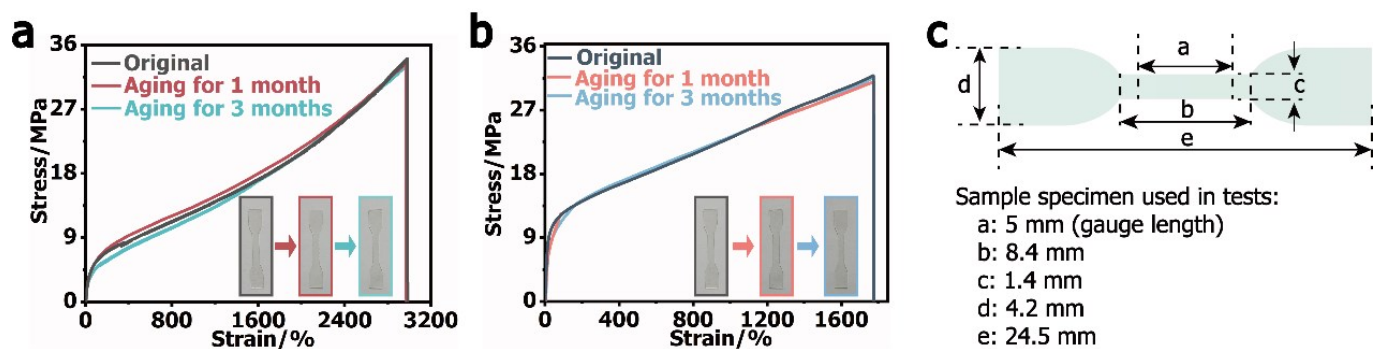

Fig. S14 The stress-strain curves for a) PPGTD<sub>0.4</sub>-IPDA<sub>1.0</sub>-IPDI<sub>0.6</sub> specimen and b) PPGTD<sub>0.3</sub>-IPDA<sub>1.0</sub>-IPDI<sub>0.7</sub> specimen obtained after being exposed to ambient conditions for 1 month and 3 months. c) Dimension illustration of dumbbell-shaped specimen.

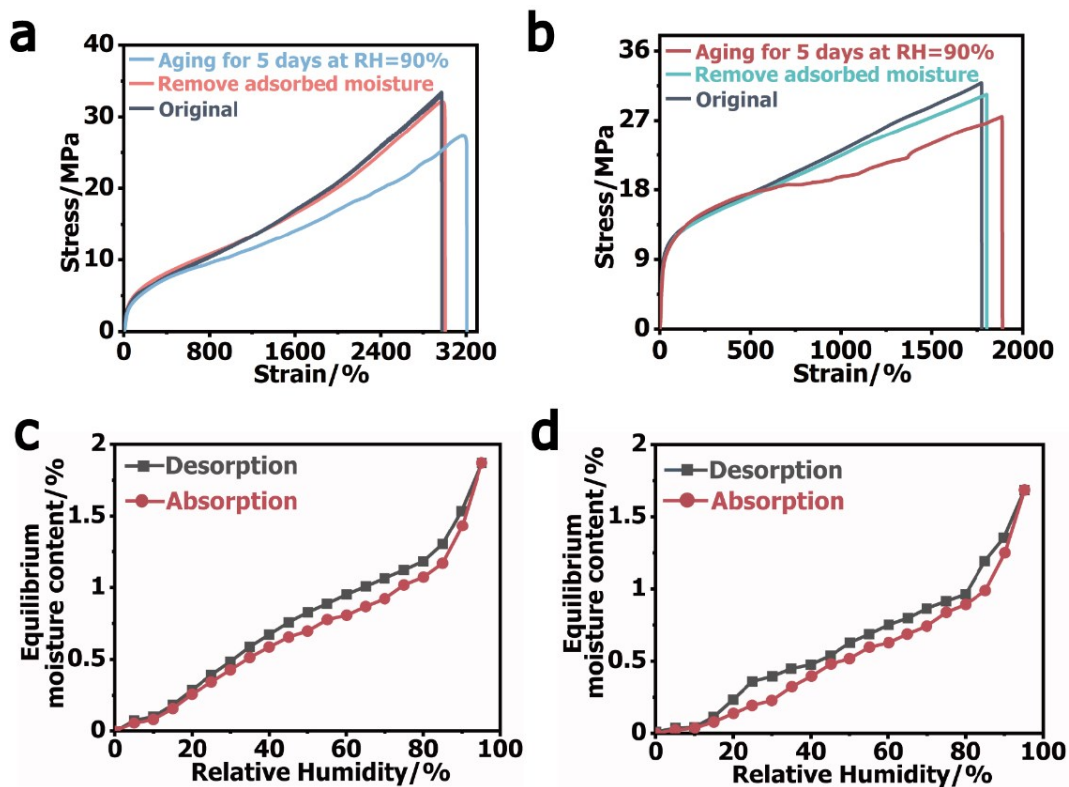

Fig. S15 a) PPGTD<sub>0.4</sub>-IPDA<sub>1.0</sub>-IPDI<sub>0.6</sub> and b) PPGTD<sub>0.3</sub>-IPDA<sub>1.0</sub>-IPDI<sub>0.7</sub> specimens were placed under high humidity at 25 °C. Water vapour adsorption-desorption isotherms for c) PPGTD<sub>0.4</sub>-IPDA<sub>1.0</sub>-IPDI<sub>0.6</sub> specimen and d) PPGTD<sub>0.3</sub>-IPDA<sub>1.0</sub>-IPDI<sub>0.7</sub> specimen. Measurements were performed at different relative humidity from RH = 0% to RH = 95% with an interval of 5%. After being placed under high humidity (RH=95%, Temp=25°C) for five days, the toughness of PPGTD<sub>0.4</sub>-IPDA<sub>1.0</sub>-IPDI<sub>0.6</sub> and PPGTD<sub>0.3</sub>-IPDA<sub>1.0</sub>-IPDI<sub>0.7</sub> only decreased from 503.3 and 386.4 MJ m<sup>-3</sup> to 473.6 and 372.2 MJ m<sup>-3</sup>, respectively. After removing the vapour, all the mechanical properties were all recovered to their original states.

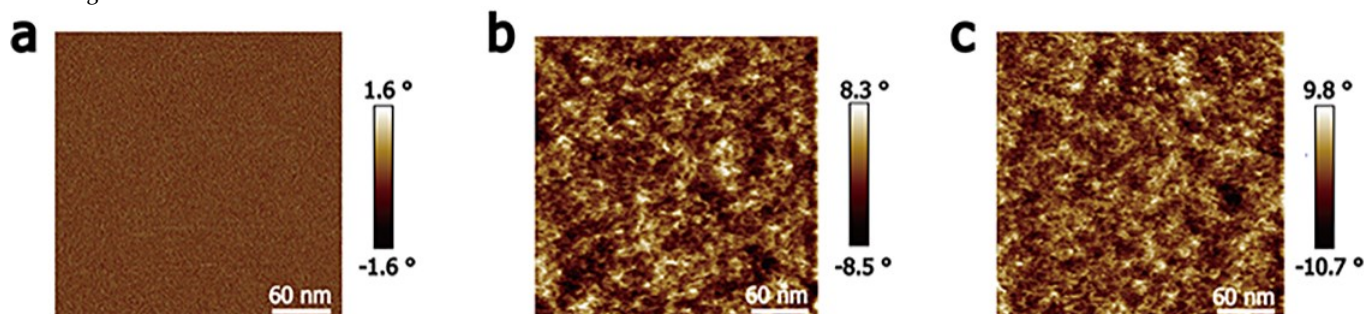

Fig. S16 AFM images of a) PPGTD-IPDA, b) PPGTD<sub>0.4</sub>-IPDA<sub>1.0</sub>-IPDI<sub>0.6</sub>, and c) PPGTD<sub>0.3</sub>-IPDA<sub>1.0</sub>-IPDI<sub>0.7</sub>. As shown, the microphase-separated structure became more and more visible with increasing IPDI content.

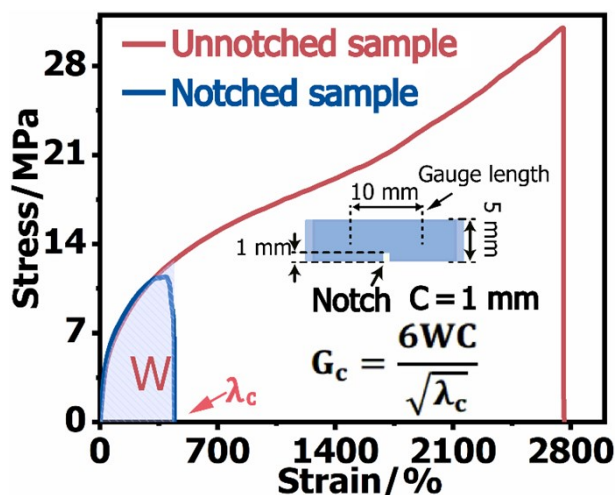

Fig. S17 Stress-strain of the unnotched and notched PPGTD<sub>0.4</sub>-IPDA<sub>1.0</sub>-IPDI<sub>0.6</sub> specimens (gauge length: 10 mm). A notch of 1 mm in length was artificially made on the one side of a rectangular specimen, and a deformation rate was 100 mm min<sup>-1</sup>.

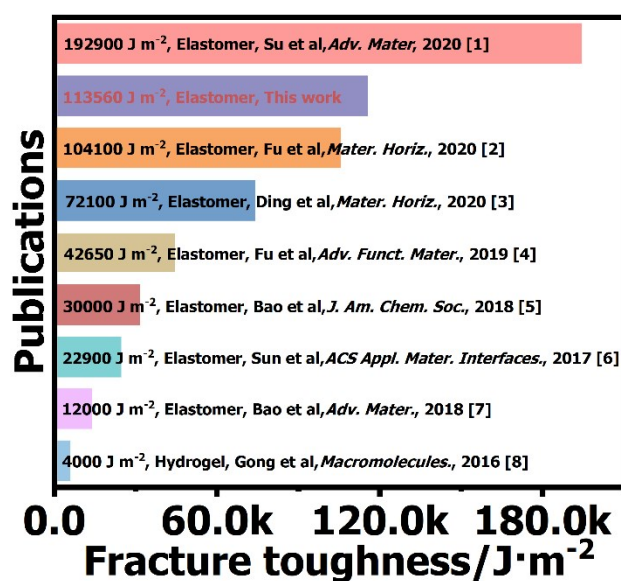

Fig. S18 Graphic comparison of fracture toughness for some tough elastomers and hydrogels reported in the previous literatures.

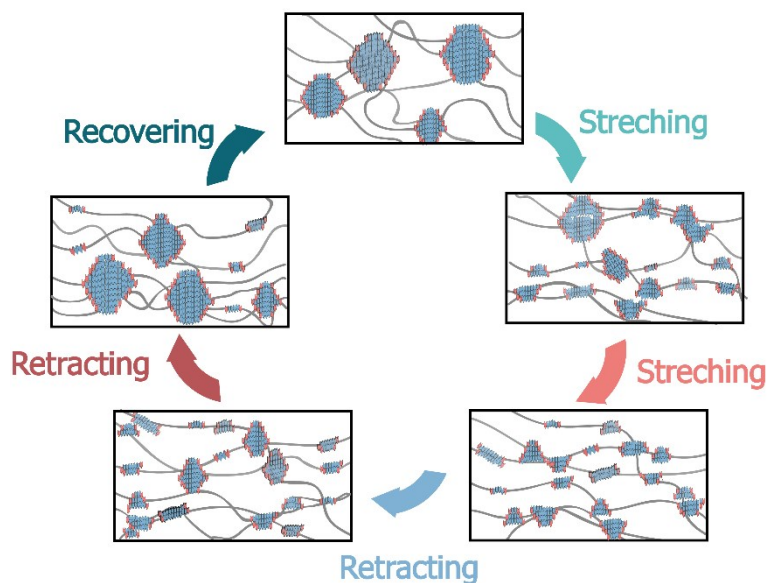

Scheme S1 Schematic illustrations of the evolution of hard domains during stretching-retracting process.



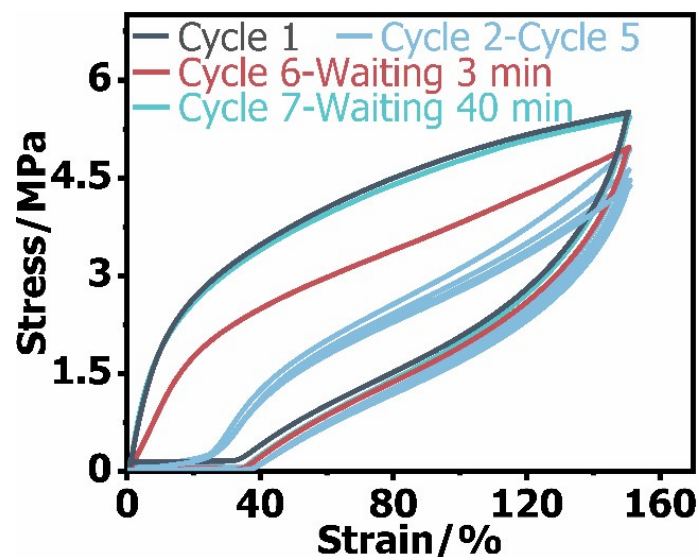

**Fig. S19** Cyclic tensile curves of PPGTD<sub>0.4</sub>-IPDA<sub>1.0</sub>-IPDI<sub>0.6</sub> specimen at a strain of 150%. The specimen was loaded-unloaded without intervals between two consecutive cyclic tensile (cycle 1-cycle 5). After that, the specimen was allowed to relax for 3 min before the 6<sup>th</sup> cyclic tensile test to eliminate the residual strain. After 40 min resting, the energy dissipation ability was completely recovered.

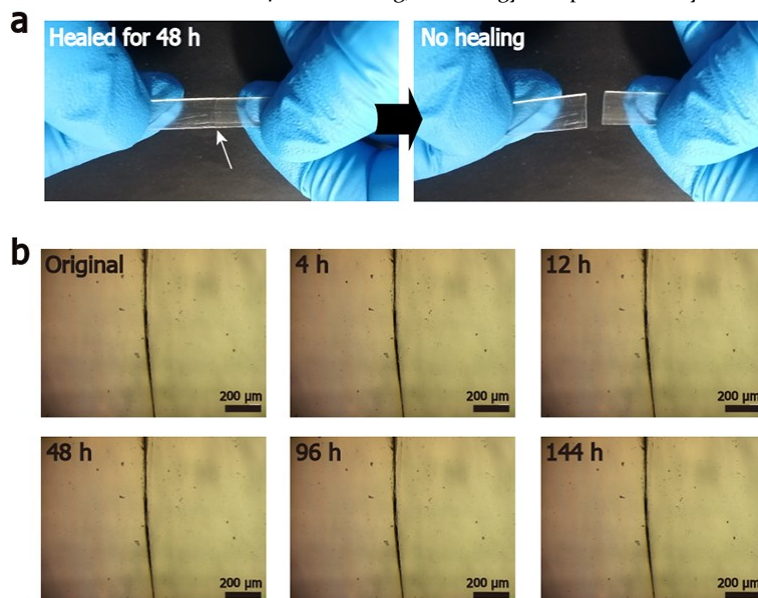

**Fig. S20** No self-healing behavior of PPGTD<sub>0.4</sub>-IPDA<sub>1.0</sub>-IPDI<sub>0.6</sub> elastomer under ambient conditions. a) respinging test and b) scratch test.

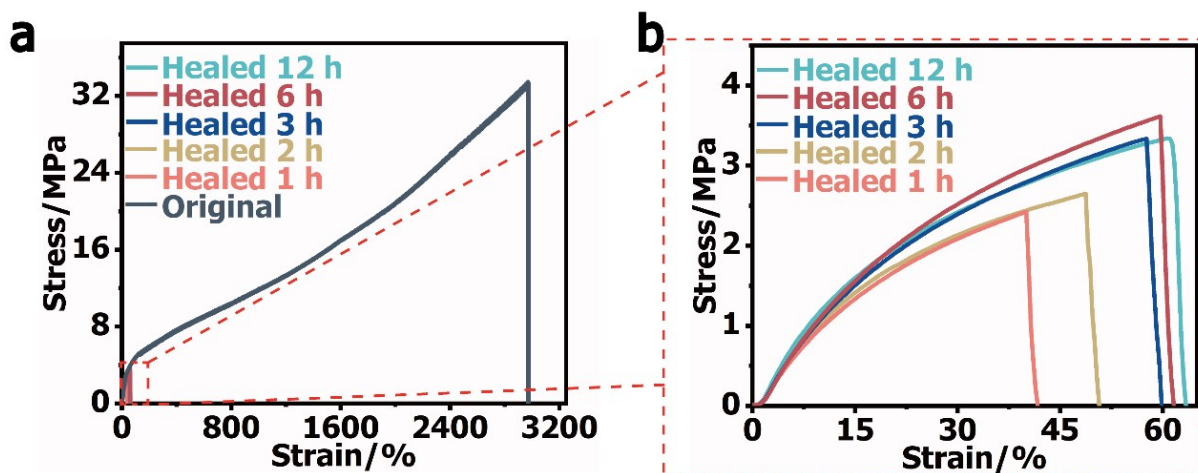

**Fig. 21** Tensile stress-strain curves of PPGTD<sub>0.4</sub>-IPDA<sub>1.0</sub>-IPDI<sub>0.6</sub> specimens at different healing time under 80 °C. The right image enlarges the local region (strain: 0-60%) in the left image to clearly illustrate the low healing efficiency under relatively high temperature.

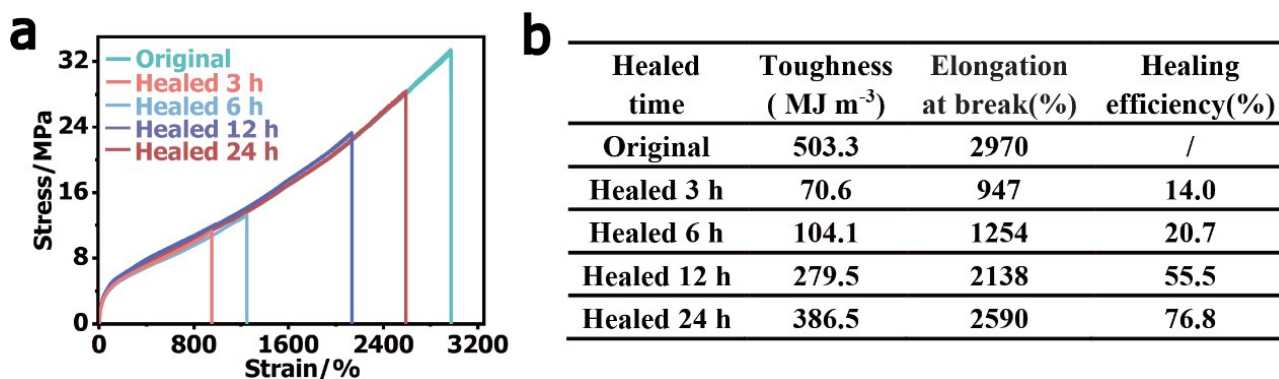

Fig. S22 a) Stress-strain curves of PPGTD<sub>0.4</sub>-IPDA<sub>1.0</sub>-IPDI<sub>0.6</sub> specimens healed under 140 °C with different healing time. b) Summary of mechanical properties of PPGTD<sub>0.4</sub>-IPDA<sub>1.0</sub>-IPDI<sub>0.6</sub> specimens with different healing time.

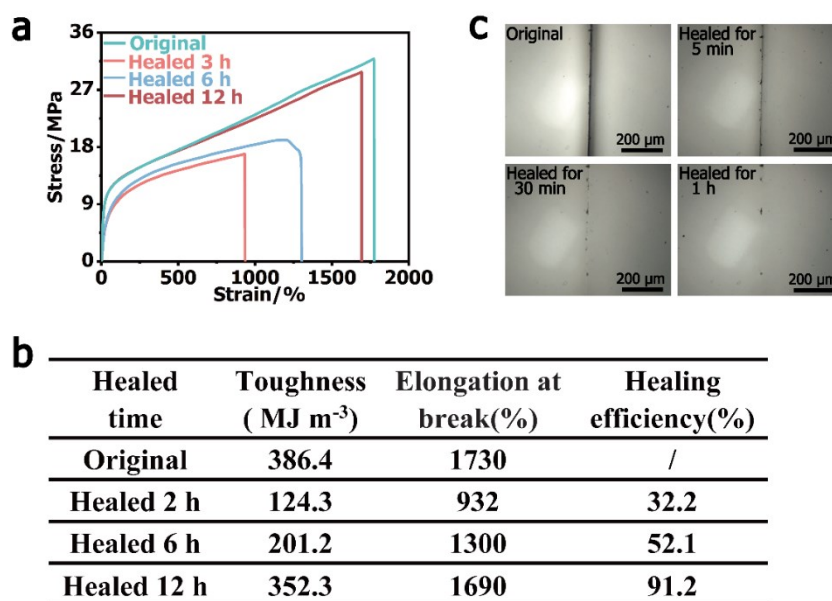

Fig. S23 a) The tensile stress-strain curves of PPGTD<sub>0.3</sub>-IPDA<sub>1.0</sub>-IPDI<sub>0.7</sub> specimens at different healing time with the assistance of trace amount of DMF under ambient conditions. b) Summary of mechanical properties of PPGTD<sub>0.3</sub>-IPDA<sub>1.0</sub>-IPDI<sub>0.7</sub> at different healing time. c) Optical photographs showing the elimination of scratch on surface of PPGTD<sub>0.3</sub>-IPDA<sub>1.0</sub>-IPDI<sub>0.7</sub> specimen with the assistance of tiny DMF.

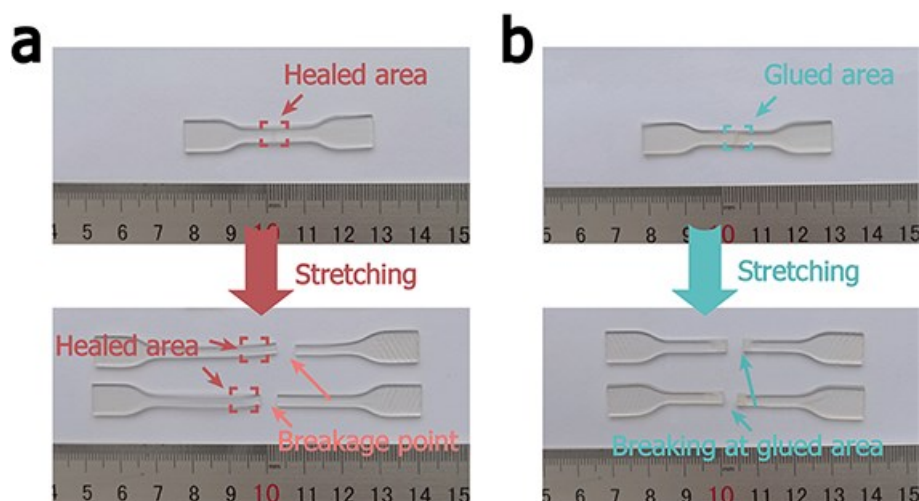

Fig. S24 a) Photographs for the healed PPGTD<sub>0.4</sub>-IPDA<sub>1.0</sub>-IPDI<sub>0.6</sub> from trace solvent-induced healing approach and the broken of the healed PPGTD<sub>0.4</sub>-IPDA<sub>1.0</sub>-IPDI<sub>0.6</sub> during stretching. b) Photographs for the glued PPGTD<sub>0.4</sub>-IPDA<sub>1.0</sub>-IPDI<sub>0.6</sub> from solvent-induced local dissolution approach and the broken of the glued PPGTD<sub>0.4</sub>-IPDA<sub>1.0</sub>-IPDI<sub>0.6</sub> during stretching.

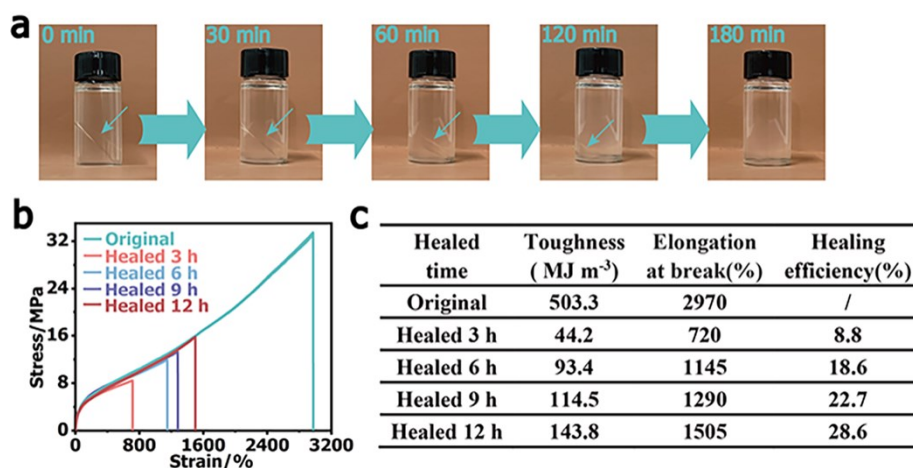

**Fig. S25** a) Photographs for demonstrating the dissolution process of PPGTD<sub>0.4</sub>-IPDA<sub>1.0</sub>-IPDI<sub>0.6</sub> in n-BuOH. b) Stress-strain curves of the healed PPGTD<sub>0.4</sub>-IPDA<sub>1.0</sub>-IPDI<sub>0.6</sub> via trace n-BuOH-induced healing with different healing time. c) Summary of mechanical properties and healing efficiencies of the healed PPGTD<sub>0.4</sub>-IPDA<sub>1.0</sub>-IPDI<sub>0.6</sub>. It can be clearly seen that although the specimen was dissolved in n-BuOH, the trace amount of n-BuOH could not achieve satisfactory healing efficiency. This result evidences that the dissolution effect is not mainly responsible for high healing efficiency.

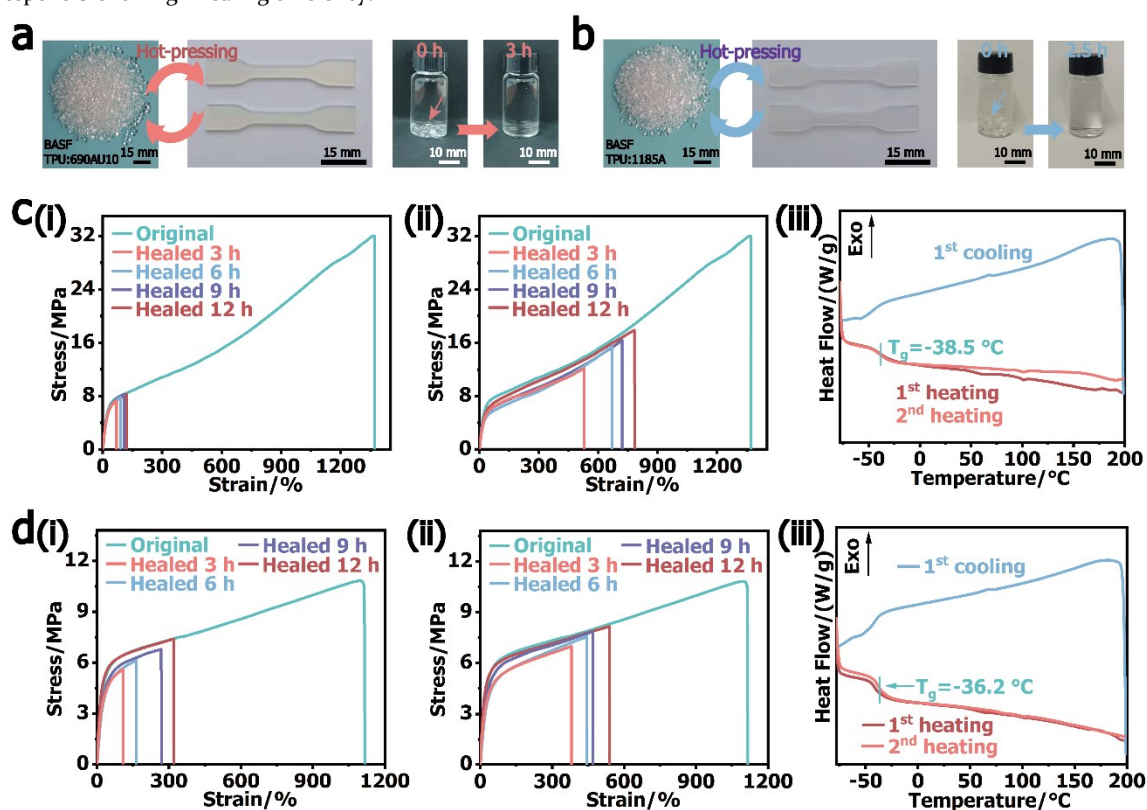

**Fig. S26** Photographs of commercially available a) TPU 690AU10 and b) TPU 1185A purchased from BASF Co., Ltd. (China). These two thermoplastic polyurethanes were molded into dumbbell-shaped specimens via hot-pressing method. They are well dissolved in DMF. c) Stress-strain curves of the healed TPU 690AU10 specimens with different healing time from i) trace DMF-induced healing approach and ii) DMF-induced local dissolution approach; iii) DSC curves of TPU 690AU10. d) Stress-strain curves of the healed TPU 1185A specimens with different healing time i) trace DMF-induced healing approach and ii) DMF-induced local dissolution approach; iii) DSC curves of TPU 1185A.

Two thermoplastic polyurethanes, TPU 690AU10 and TPU 1184A were purchased from BASF Co., Ltd. (China). After being molded into dumbbell-shaped specimens via hot-pressing method, the healing experiments were performed from different approaches. Although the  $T_g$  values of these polyurethanes were far below room temperature, the healing efficiencies of 690AU10 and 1164A from trace solvent-induced healing were only 3.1 wt% and 22 wt%, respectively after 12 h healing, confirming that not all the thermoplastic polyurethanes can achieve high healing efficiency via trace solvent-induced healing approach. Designing suitable structure for thermoplastic polyurethanes is of significance to high healing efficiency. The healing efficiencies of 690AU10 and 1164A from solvent-induced local dissolution increased to 36.9% and 39.7%, respectively. However, this process is not a real "healing" due to the obvious dimensional changes on glued areas, making polyurethanes unsafe for further use. Therefore, although trace solvent-induced healing is a promising method, it is not easy to achieve high healing efficiency. The selection of proper solvent and how to design suitable structures of thermoplastics should be primarily considered.



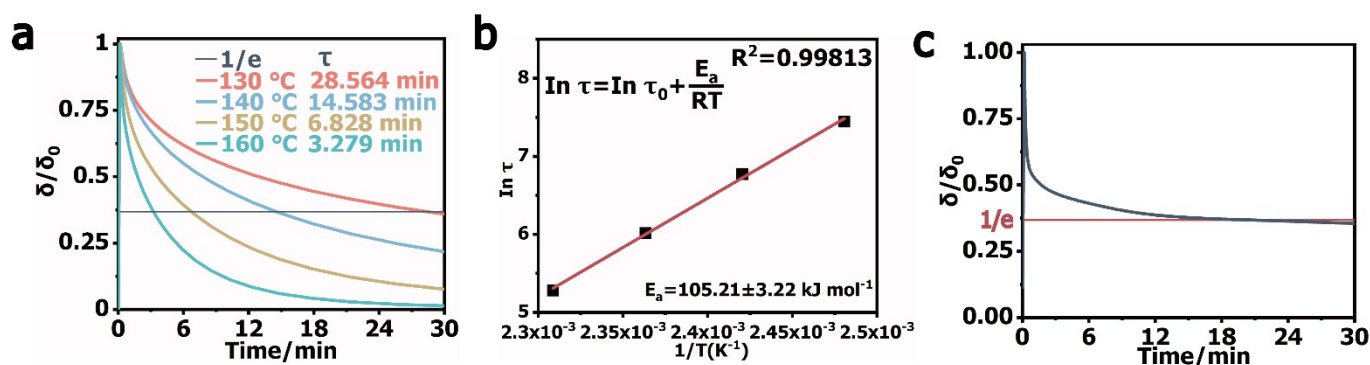

**Fig. S27** a) Stress relaxation curves of PPGTD<sub>0.4</sub>-IPDA<sub>1.0</sub>-IPDI<sub>0.6</sub> specimens to 120% strain at different temperatures. b)  $\ln \tau - 1/T$  curve of PPGTD<sub>0.4</sub>-IPDA<sub>1.0</sub>-IPDI<sub>0.6</sub> specimen. As shown, the value of  $\tau$  as a function of the inverse temperature follows Arrhenius' law, which is given by equation:  $\ln \tau = \ln \tau_0 + E_a/RT$ . The stress relaxation activation energy is calculated as 105.21 kJ mol<sup>-1</sup> and the corresponding relaxation time ( $\tau$ ) at 25 °C is calculated as 1303 h. c) Stress relaxation curves of PPGTD<sub>0.4</sub>-IPDA<sub>1.0</sub>-IPDI<sub>0.6</sub> specimen absorbing DMF vapour in short time. As shown, the relaxation time ( $\tau$ ) dramatically decreased to 20.3 min, proving the solvent-accelerated exchange of H-bonds within hard domains.

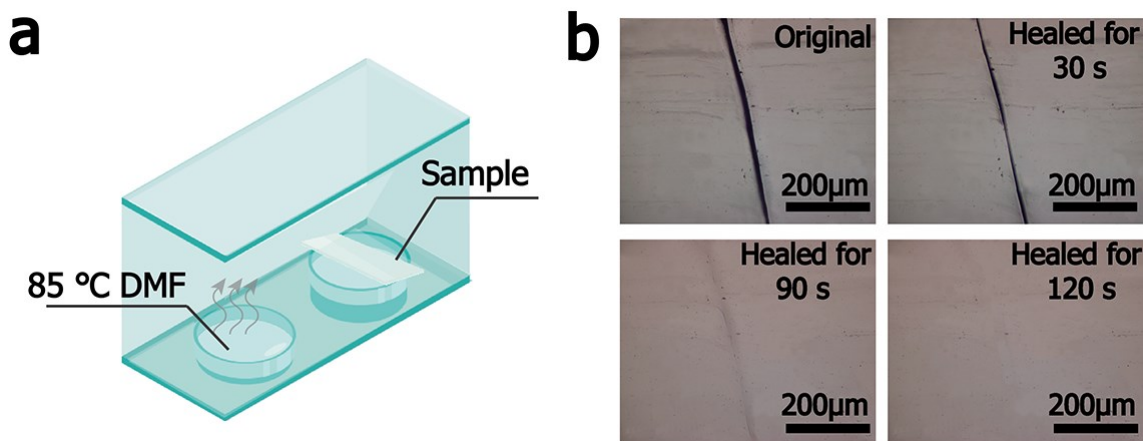

**Fig. S28** a) Schematic illustration for healing in solvent vapour. b) Optical photographs of the surface scratch on PPGTD<sub>0.4</sub>-IPDA<sub>1.0</sub>-IPDI<sub>0.6</sub> film before and after healing in solvent vapour.

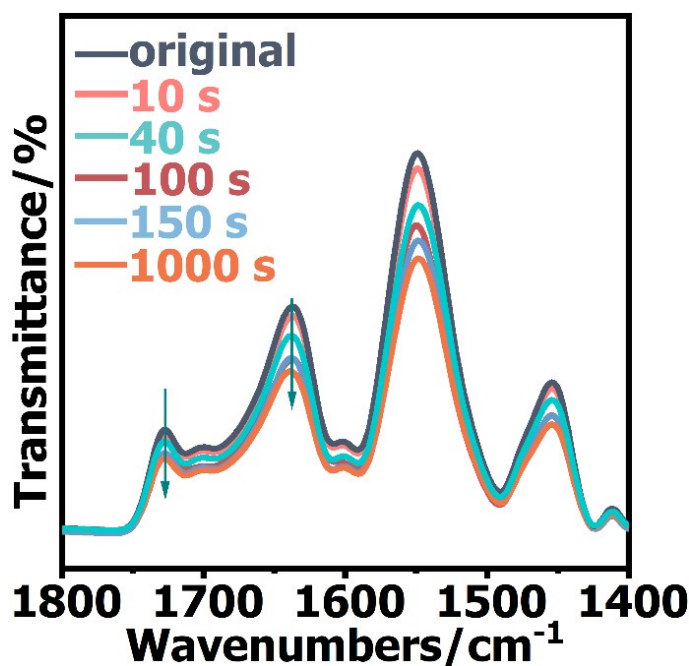

**Fig. S29** Evolution of FTIR spectra of PPGTD<sub>0.4</sub>-IPDA<sub>1.0</sub>-IPDI<sub>0.6</sub> specimen that being contacted with trace n-BuOH. It can be clearly seen in Fig. S29, no obvious wavenumber shifts of  $\nu_{C=O, \text{urea}}$  (1632 cm<sup>-1</sup>) and  $\nu_{C=O, \text{urethane}}$  (1726 cm<sup>-1</sup>) were observed when trace n-BuOH was used. This is in sharp contrast to the trace DMF, indicating that the n-BuOH could not interfere the structure of H-bond and dissociate the hard domains in a short time.



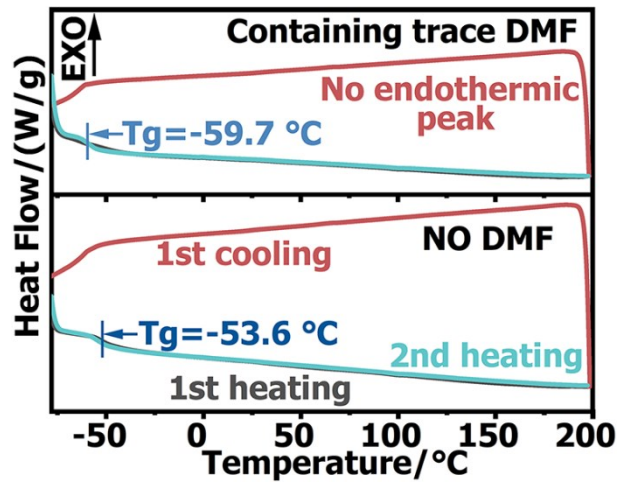

Fig. S30 DSC curves of PPGTD<sub>0.4</sub>-IPDA<sub>1.0</sub>-IPDI<sub>0.6</sub> without DMF and with the assistance of trace amount of DMF. As shown, DMF decreased T<sub>g</sub> value from -53.6 to -59.7 °C, revealing that DMF could dissociate the hard domain and facilitate the mobility of polymeric chains.

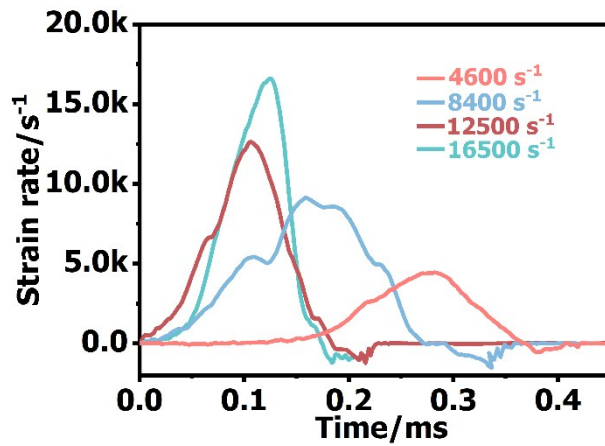

Fig. S31 Strain rate versus time in SHPB tests with different velocities at 25 °C.

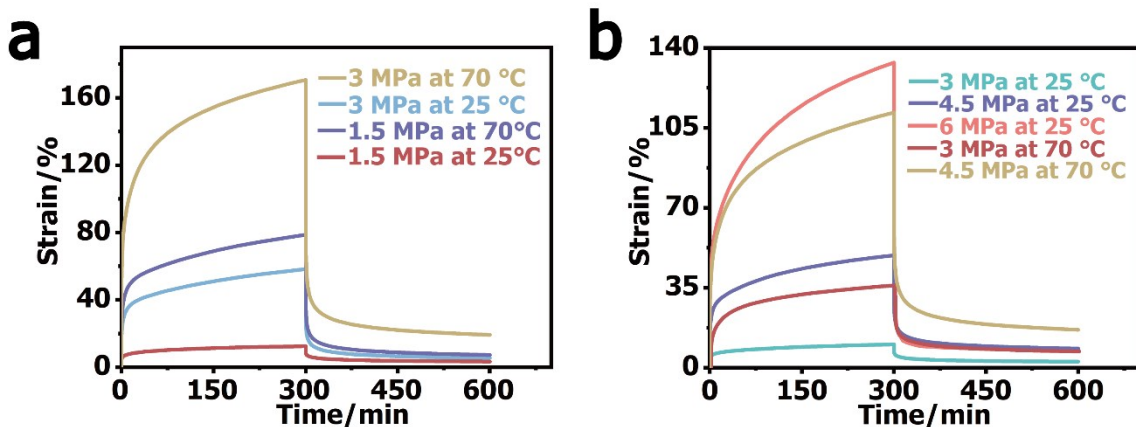

Fig. S32 Creep-recovery behaviors of a) PPGTD<sub>0.4</sub>-IPDA<sub>1.0</sub>-IPDI<sub>0.6</sub> specimen and b) PPGTD<sub>0.3</sub>-IPDA<sub>1.0</sub>-IPDI<sub>0.7</sub> specimen under different stress levels and temperatures. As shown, it is obvious that elevating temperature did not significantly change the creep-recovery behaviors of PPGTD<sub>0.4</sub>-IPDA<sub>1.0</sub>-IPDI<sub>0.6</sub>, revealing the good thermal-resistance of IPDI-modified hard domains.

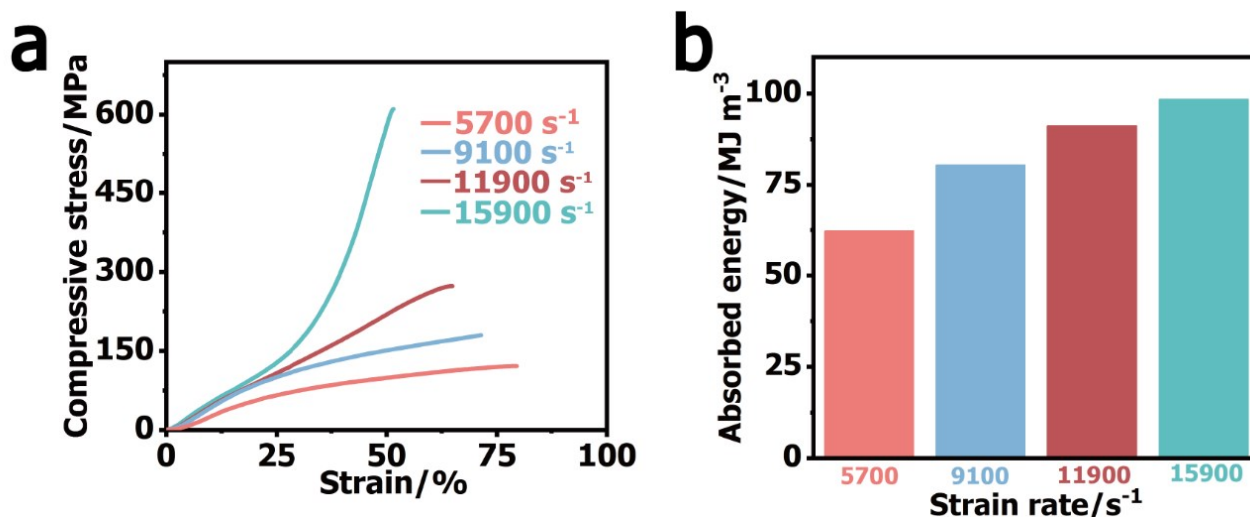

Fig. S33 a) Compressive stress-strain curves of PPGTD<sub>0.3</sub>-IPDA<sub>1.0</sub>-IPDI<sub>0.7</sub> specimen (diameter: 7 mm, thickness: 2 mm) for the SHPB tests with different strain rates. b) Effects of strain rates on absorbed energy.

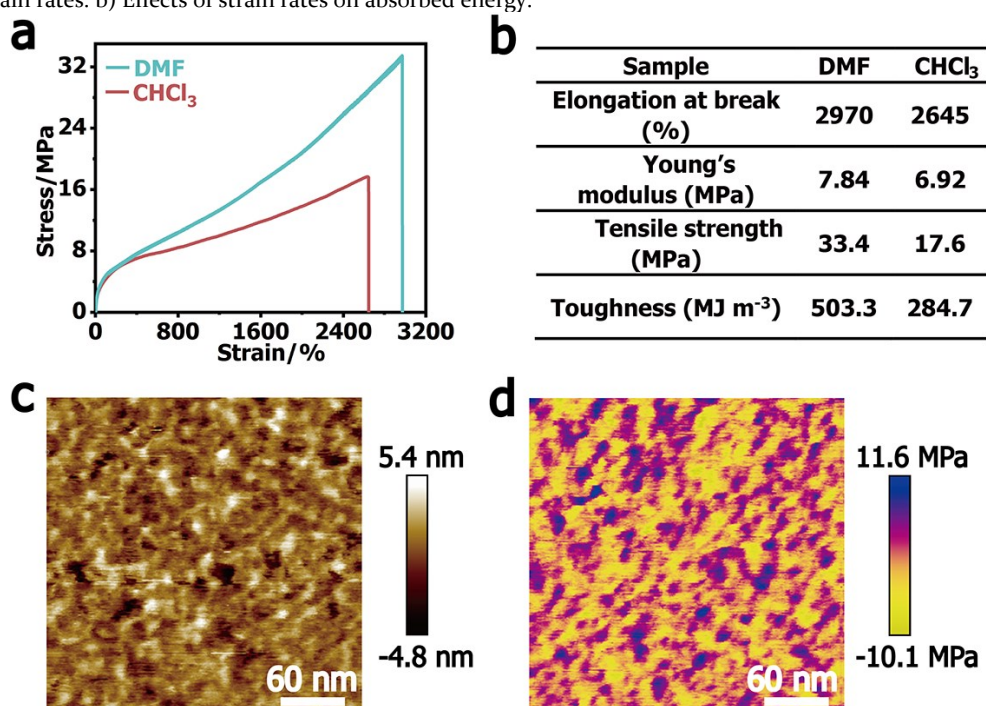

Fig. S34 a) Stress-strain curves of the PPGTD<sub>0.6</sub>-IPDA<sub>1.0</sub>-IPDI<sub>0.4</sub> using different solvents (DMF and CHCl<sub>3</sub>). The synthetic procedures are the same except for solvents. b) Summary of mechanical properties of the PPGTD<sub>0.6</sub>-IPDA<sub>1.0</sub>-IPDI<sub>0.4</sub> obtained using DMF and CHCl<sub>3</sub> as solvent. AFM c) height and d) modulus map of a 300 × 300 nm<sup>2</sup> region of PPGTD<sub>0.6</sub>-IPDA<sub>1.0</sub>-IPDI<sub>0.4</sub> using CHCl<sub>3</sub> as solvent. As can be seen in Fig. S34, the mechanical properties of PPGTD<sub>0.6</sub>-IPDA<sub>1.0</sub>-IPDI<sub>0.4</sub> using CHCl<sub>3</sub> as solvent were inferior to that of PPGTD<sub>0.6</sub>-IPDA<sub>1.0</sub>-IPDI<sub>0.4</sub> using DMF as solvent. It can be inferred that difference of solvent polarity influences the composition of hard domains, including: binding mode/strength of H-bonds, altering the microstructure. Although PPGTD<sub>0.6</sub>-IPDA<sub>1.0</sub>-IPDI<sub>0.4</sub> using CHCl<sub>3</sub> as solvent retained microphase-separated structure, the modulus of hard domains was lower than that of PPGTD<sub>0.6</sub>-IPDA<sub>1.0</sub>-IPDI<sub>0.4</sub> using DMF as solvent, proving changes of the microstructure.

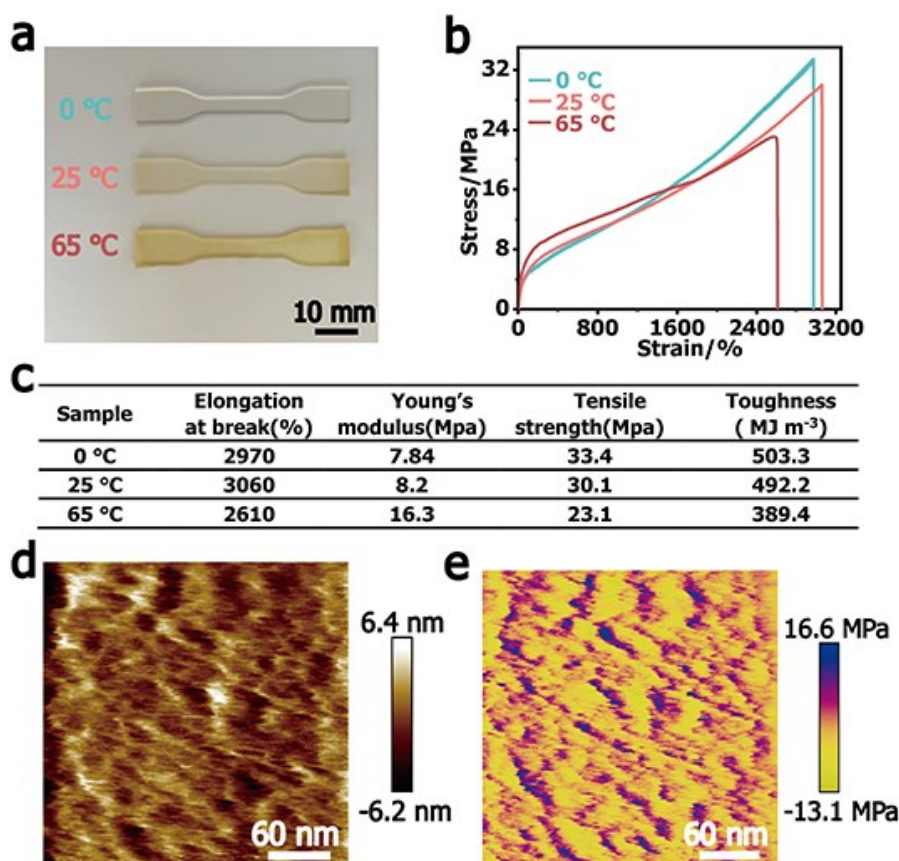

**Fig. S35** a) Dumbbell-shaped, b) Stress-strain curves, and c) Summary of mechanical properties of PPGTD<sub>0.4</sub>-IPDA<sub>1.0</sub>-IPDI<sub>0.6</sub> specimens obtained from different reaction temperatures. AFM d) height and e) modulus map of a 300 × 300 nm<sup>2</sup> region of PPGTD<sub>0.4</sub>-IPDA<sub>1.0</sub>-IPDI<sub>0.6</sub> obtained with the reaction temperature as 65 °C. As can be seen in Fig. S35, with the increase of the reaction temperature, the color of the specimens gradually turned from colorless to yellow. When the temperature was elevated to 65°C, the phenomenon of local gelation was observed. Although the high temperature accelerated the reaction rate and increased Young' modulus to a certain extent, the local gelation during reaction decreased the tensile strength and toughness. All properties considered, the optimal reaction temperature was determined as 0 °C.

## References:

1. X. H. Wang, S. N. Zhan, Z. Y. Lu, J. Li, X. Yang, Y. N. Qiao, Y. F. Men, J. Q. Sun, *Adv. Mater.* **2020**, *32*, 2005759.
2. Y. H. Li, W. J. Li, A. L. Sun, M. F. Jing, X. J. Liu, L. H. Wei, K. Wu, Q. Fu, *Mater. Horiz.* **2021**, *8*, 267-275.
3. K. Song, W. J. Ye, X. C. Gao, H. G. Fang, Y. Q. Zhang, Q. Zhang, X. L. Li, S. Z. Yang, H. H. Wei, Y. S. Ding, *Mater. Horiz.* **2021**, *8*, 216-223.
4. D. Wang, J. H. Xu, J. Y. Chen, P. Hu, Y. Wang, W. Jiang, J. J. Fu, *Adv. Funct. Mater.* **2020**, *30*, 1907109.
5. X. Z. Yan, Z. Y. Liu, Q. H. Zhang, J. Lopez, H. Wang, H. C. Wu, S. M. Niu, H. P. Yan, S. H. Wang, T. Lei, J. H. Li, D. P. Qi, P. G. Huang, J. P. Huang, Y. Zhang, Y. Y. Wang, G. L. Li, J. B.H. Tok, X. D. Chen, Z. N. Bao, *J. Am. Chem. Soc.* **2018**, *140*, 5280-5289.
6. Y. Wang, X. K. Liu, S. H. Li, T.Q. Li, Y. Song, Z. D. Li, W. K. Zhang, J. Q. Sun, *ACS Appl. Mater. Interfaces.* **2017**, *9*, 29120-29129.
7. J. H. Kang, D. H. Son, G. J. N. Wang, Y. X. Liu, J. Lopez, Y. Kim, J. Y. Oh, T. Katsumata, J. Mun, Y. J. Lee, L. H. Jin, J. B.H. Tok, Z. N. Bao, *Adv. Mater.* **2018**, *30*, 1706846.
8. A. B. Ihsan, T. L. Sun, T. Kurokawa, S. N. Karobi, T. Nakajima, T. Nonoyama, C. K. Roy, F. Luo, J. P. Gong, *Macromolecules* **2016**, *49*, 4245-4252.

**Video S1:** Demonstration of the mechanically robust PPGTD<sub>0.4</sub>-IPDA<sub>1.0</sub>-IPDI<sub>0.6</sub> elastomer.

**Video S2:** Demonstration of the energy-absorbing ability of PPGTD<sub>0.4</sub>-IPDA<sub>1.0</sub>-IPDI<sub>0.6</sub> elastomer during ball-dropping test.

**Video S3:** Demonstration of the rebound effect of PPGTD<sub>0.4</sub>-IPDA<sub>1.0</sub>-IPDI<sub>0.6</sub> elastomer during SHPB test.

**Video S4:** Demonstration of the original PPGTD<sub>0.4</sub>-IPDA<sub>1.0</sub>-IPDI<sub>0.6</sub> elastomer during drop hammer impact test.

**Video S5:** Demonstration of the recovered PPGTD<sub>0.4</sub>-IPDA<sub>1.0</sub>-IPDI<sub>0.6</sub> elastomer during drop hammer impact test.

**Video S6:** Demonstration of the damage of PPGTD<sub>0.4</sub>-IPDA<sub>1.0</sub>-IPDI<sub>0.6</sub> elastomer during drop hammer impact test.

**Video S7:** Demonstration of the healed PPGTD<sub>0.4</sub>-IPDA<sub>1.0</sub>-IPDI<sub>0.6</sub> elastomer during drop hammer impact test.
